# Supplementary material
Source: PubMed Central journal article supplement (PMC3457105)
Supplement: AEM.01386-12_zam999103765so1.pdf [file AEM.01386-12_zam999103765so1.pdf]

## Supplementary Information

### Supplementary Method

*Hydrolysis of cellodextrin by Gluc1C* - Cello-oligosaccharides ranging from C2 to C6 (Megazyme), were used at a concentration of 5 mg/ml to evaluate hydrolysis by Gluc1C. These oligosaccharides were incubated with 4.5 units of Gluc1C for 3 hours at 40 °C and leftover products were measured using HPLC with Aminex 87H column (Bio-Rad).

**Supplementary Table 1.** Extent of hydrolysis of various cellodextrins by Gluc1C

| Substrates Used    | % Substrate Utilized | Product Formed |
|--------------------|----------------------|----------------|
| Cellobiose (C2)    | 95                   | Glucose (C1)   |
| Cellotriose (C3)   | 91                   | Glucose (C1)   |
| Cellotetrose (C4)  | 12.3                 | Glucose (C1)   |
| Cellopentoase (C5) | 19.6                 | Glucose (C1)   |
| Cellohexose (C6)   | 1.52                 | Glucose (C1)   |

**Supplementary Table 2.** Purification table for Endo5A, Gluc1C and EG5

| Proteins                          | Purification step | Volume (ml) <sup>a</sup> | Protein concentration (mg ml <sup>-1</sup> ) | Total protein (mg) | Total activity (U) | Fold purification | Specific activity (U mg <sup>-1</sup> ) |
|-----------------------------------|-------------------|--------------------------|----------------------------------------------|--------------------|--------------------|-------------------|-----------------------------------------|
| <b>Endo5A</b>                     | Cell Lysate       | 45                       | 6.8                                          | 306                | 2131               | 1.00              | 6.96                                    |
|                                   | Metal Affinity    | 30                       | 1.16                                         | 34.8               | 929.5              | 8.79              | 26.71                                   |
| <b>Gluc1C</b>                     | Cell Lysate       | 45                       | 5.5                                          | 247.5              | 945                | 1.00              | 3.82                                    |
|                                   | Metal Affinity    | 32                       | 0.74                                         | 23.68              | 139.4              | 10.45             | 5.89                                    |
| <b>EG5 endoglucanase activity</b> | Cell Lysate       | 45                       | 7.57                                         | 340.65             | 2947               | 1.00              | 8.65                                    |
|                                   | Metal Affinity    | 28                       | 1.47                                         | 41.16              | 988.4              | 8.28              | 24.01                                   |
| <b>EG5 β-glucosidase activity</b> | Cell Lysate       | 45                       | 7.57                                         | 340.65             | 2395               | 1.00              | 7.03                                    |
|                                   | Metal Affinity    | 28                       | 1.47                                         | 41.16              | 480.2              | 8.28              | 11.67                                   |

<sup>a</sup> Volume of cell lysate was prepared from 800 ml of culture

# Supplementary Figure 1

(A)

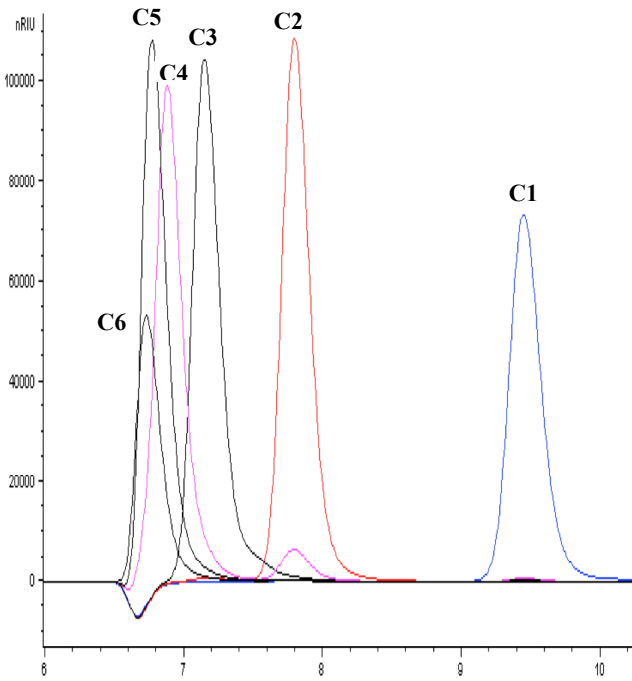

(B)

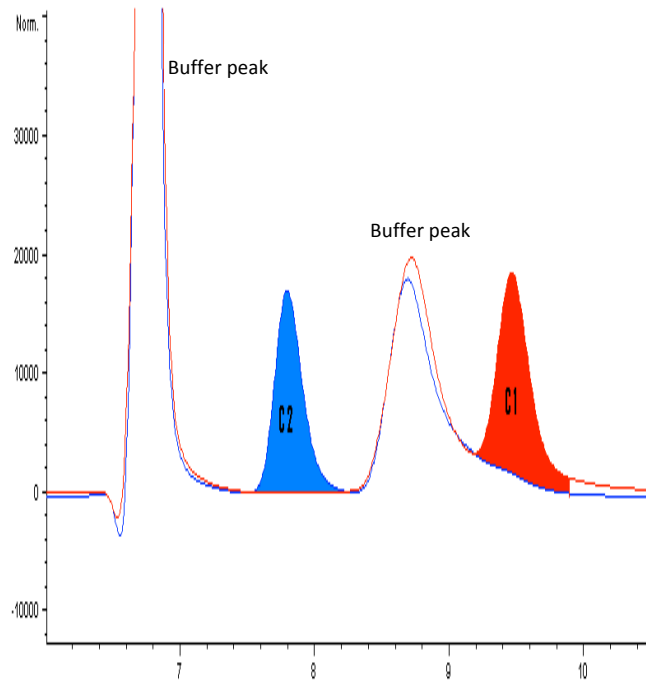

(C)

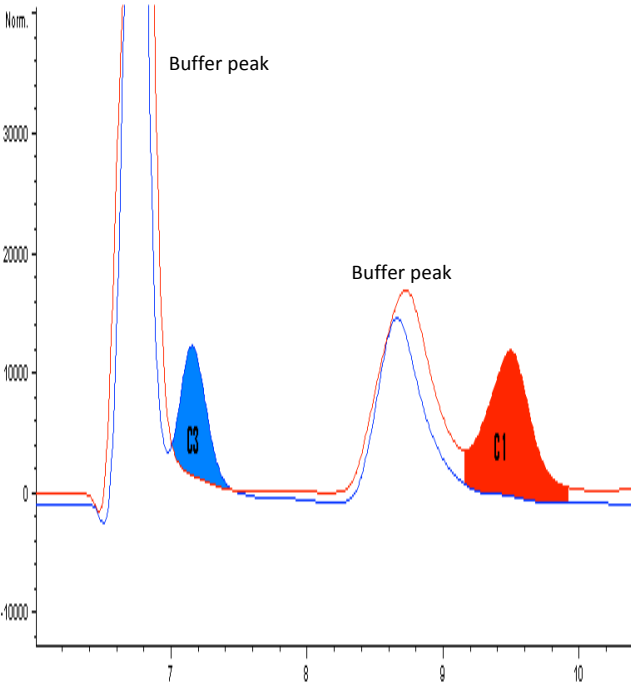

(D)

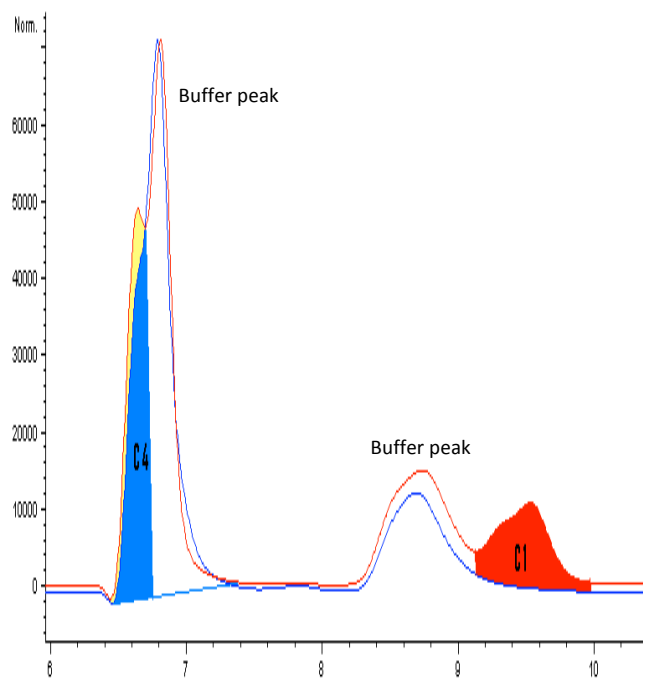

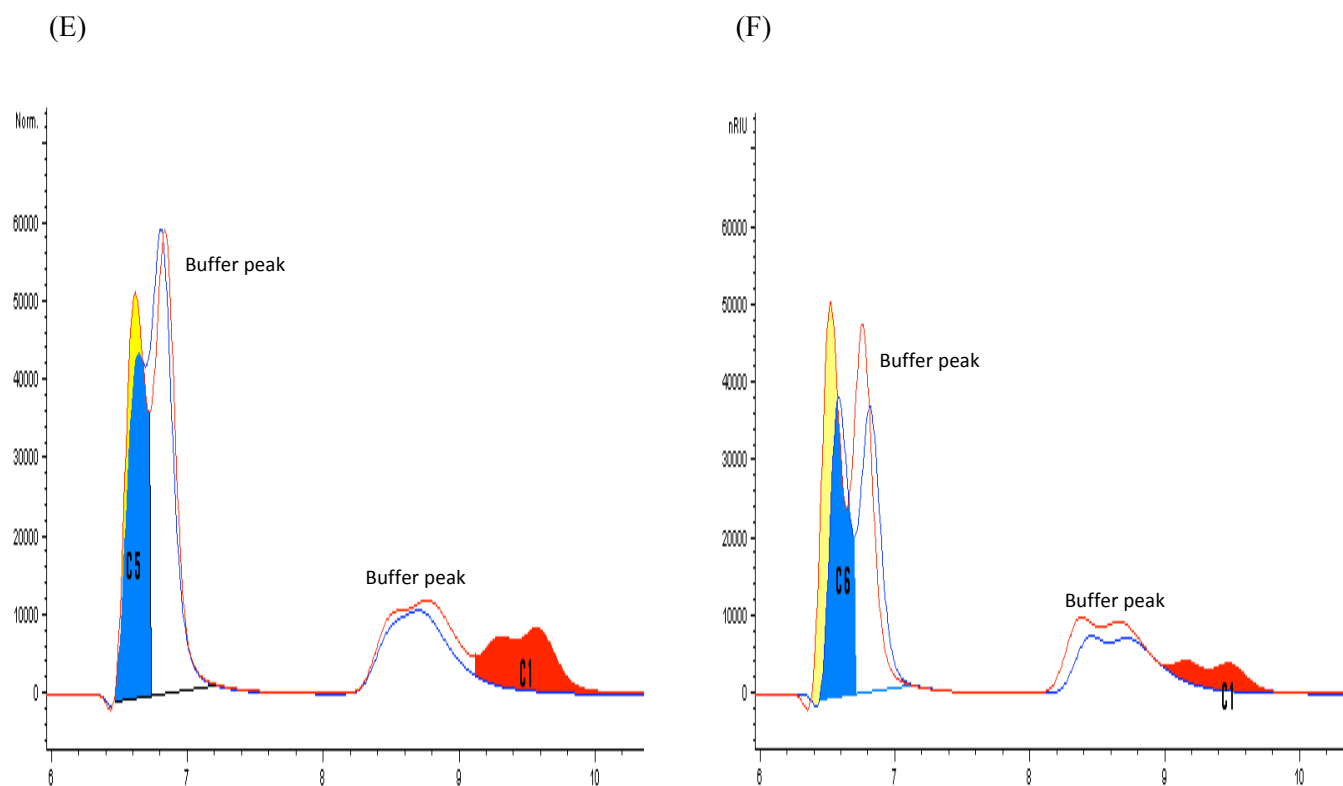

**Supplementary Figure 1.** Substrate specificity of Gluc1C towards different cello-oligosaccharides. (A) Standards of cello-oligosaccharides separated on HPLC. Cello-oligosaccharides of chain length C2 or cellobiose (B), C3 or cellotriose (C), C4 or cellotetraose (D), C5 or cellopentose (E), and C6 or cellohexaose (F) were incubated with Gluc1C and their corresponding products were monitored through HPLC. The profiles at 0 hr (blue line) and 3 hr (red line) have been overlaid and presented in the figure.

## Supplementary Figure 2

(A)

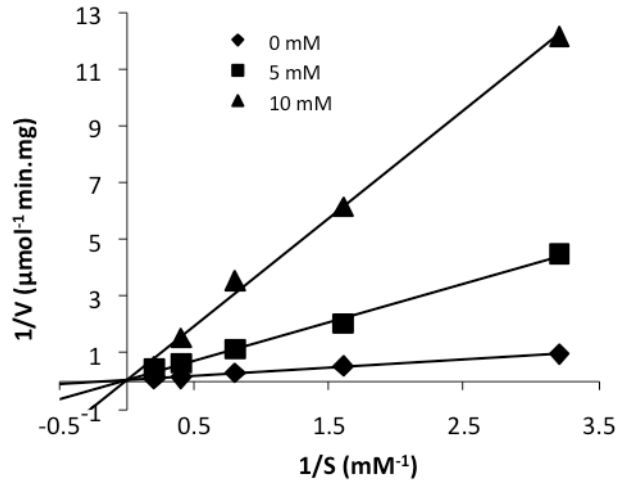

(B)

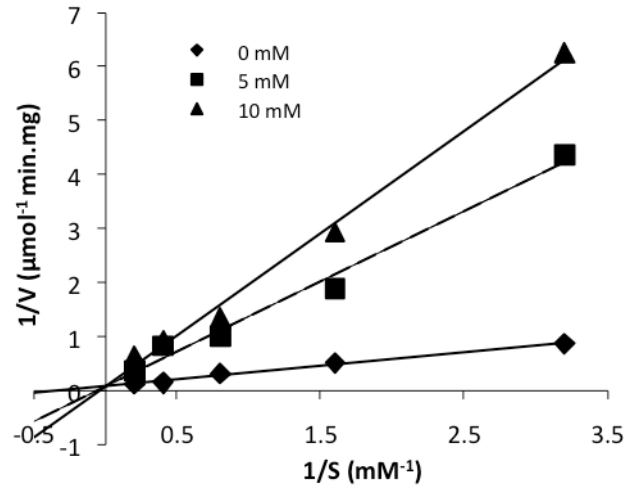

**Supplementary Figure 2.** Inhibition kinetics for  $\beta$ -glucosidase activity of (A) Gluc1C and (B) EG5. Three concentrations of glucono- $\delta$ -lactone (0, 5, 10 mM) were used to determine  $K_i$  of the two recombinant proteins.  $K_i$  of Gluc1C and EG5 were  $1.1 \pm 0.37 \text{ mM}$  and  $1.2 \pm 0.22$ , respectively.
